# Supplementary material for: HPV Status as Prognostic Biomarker in Head and Neck Cancer—Which Method Fits the Best for Outcome Prediction?
Source: MDPI journal article supplement (doi:10.3390/cancers13184730), 2021-09-21
Supplement: s1 [file s1]

Fisher's exact test

| Data analyzed   | p16-Ki67 pos | p16-Ki67 neg | Total |
|-----------------|--------------|--------------|-------|
| HPV-DNA-PCR pos | 34           | 11           | 45    |
| HPV-DNA-PCR neg | 7            | 101          | 108   |
| Total           | 41           | 112          | 153   |

P<0.0001

| Data analyzed   | HPV-DNA-ISH pos | HPV-DNA-ISH neg | Total |
|-----------------|-----------------|-----------------|-------|
| HPV-DNA-PCR pos | 20              | 25              | 45    |
| HPV-DNA-PCR neg | 3               | 105             | 108   |
| Total           | 23              | 130             | 153   |

P<0.0001

| Data analyzed   | p16-Ki67 pos | p16-Ki67 neg | Total |
|-----------------|--------------|--------------|-------|
| HPV-DNA-ISH pos | 21           | 2            | 23    |
| HPV-DNA-ISH neg | 20           | 110          | 130   |
| Total           | 41           | 112          | 153   |

P<0.0001

**Supplementary Figure S1: Correlation of HPV-DNA-PCR, HPV-DNA-ISH, and p16-Ki67 dual staining results.** Results of HPV-DNA-PCR, HPV-DNA-ISH, and p16-Ki67 dual stain are shown in contingency tables. Correlation between HPV-DNA-PCR and p16-Ki67 dual stain (upper table), HPV-DNA-PCR and HPV-DNA-ISH (middle table) as well as HPV-DNA-ISH and p16-Ki67 dual stain (lower table) was analyzed using Fisher's exact test.
